# Supplementary material
Source: HighWire-hosted journal article supplement (http://rc.rcjournal.com/highwire/filestream/22442/field_highwire_adjunct_files/0/rc-08921-File001.docx)
Supplement: rc-08921-File001.docx [file rc-08921-File001.docx]

Supplementary materials

|  | **Variable PSV** (n=10) | | **NAVA** (n=10) | | **P value** |
| --- | --- | --- | --- | --- | --- |
| **Asynchrony index (**t0**) (%)** | 0.030 | (0-0.093) | 0.063 | (0.021-0.127) | 0.19 |
| **Asynchrony index (**t12**) (%)** | 0.040 | (0.022-0.366) | 0.049 | (0.043-0.092) | 0.69 |
| **Asynchrony index (**t24**) (%)** | 0.211 | (0.055-0.714) | 0.047 | (0.022-0.083) | 0.74 |
| **Ineffective Trigger (**t0**) (n/min)** | 0 | (0-20) | 0 | (0-0) | 0.13 |
| **Ineffective Trigger (**t12**) (n/min)** | 0.5 | (0-9) | 0 | (0-1) | 0.21 |
| **Ineffective Trigger (**t24**) (n/min)** | 3 | (0-113) | 0 | (0-0) | 0.03* |
| **Premature termination (**t0**) (n/min)** | 0 | (0-0) | 0 | (0-17) | 0.17 |
| **Premature termination (**t12**) (n/min)** | 0 | (0-0) | 0.5 | (0-14) | 0.07 |
| **Premature termination (**t24**) (n/min)** | 0 | (0-7) | 0.5 | (0-5) | 0.44 |
| **Flow asynchronies (**t0**) (n/min)** | 0 | (0-0) | 0 | (0-7) | 0.40 |
| **Flow asynchronies (**t12**) (n/min)** | 0 | (0-0) | 0 | (0-5) | 0.40 |
| **Flow asynchronies (**t24**) (n/min)** | 0 | (0-0) | 0 | (0-4) | 0.17 |
| **Double trigger (**t0**) (n/min)** | 0 | (0-127) | 5.5 | (0-15) | 0.12 |
| **Double trigger(**t12**) (n/min)** | 0 | (0-2) | 3.5 | (0-9) | 0.10 |
| **Double trigger (**t24**) (n/min)** | 1.5 | (0-6) | 4.5 | (0-14) | 0.25 |
| **Delayed termination (**t0**) (n/min)** | 0 | (0-0) | 0 | (0-0) | NA |
| **Delayed termination (**t12**) (n/min)** | 0 | (0-105) | 0 | (0-4) | 0.46 |
| **Delayed termination (**t24**) (n/min)** | 0 | (0-194) | 0 | (0-6) | 1 |
| **Auto trigger (**t0**) (n/min)** | 0 | (0-0) | 0 | (0-0) | NA |
| **Auto trigger (**t12**) (n/min)** | 0 | (0-0) | 0 | (0-0) | NA |
| **Auto trigger (**t24**) (n/min)** | 0 | (0-0) | 0 | (0-0) | NA |

Table 1s: Patient – ventilator asynchronies between variable PSV and NAVA at different time Continuous data are reported as median (interquartile range). PSV pressure support ventilation, NAVA Neurally adjusted ventilatory assist, min minute, t0 at the beginning of treatment, t12 after 12 hours of treatment, t24 after 24 hours of treatment.

| **CV** |  | **T0** | **T12** | **T24** | **P value** |
| --- | --- | --- | --- | --- | --- |
| PSV |  |  |  |  |  |
|  | VT | 0.33 | 0.32 | 0.21 | p<0.0001 |
| t0 - t12 p= 0.16; t0 - t24 p<0.0001; t12 - t24 p<0.0001 | | | | | |
|  | RR | 0.40 | 0.40 | 0.46 | p<0.001 |
| t0 - t12 p= 0.99; t0 - t24 p= 0.000; t12 - t24 p= 0.001 | | | | | |
|  | PS | 0.38 | 0.46 | 0.42 | p<0.0001 |
| t0 - t12 p<0.0001; t0 - t24 p= 0.02; t12 - t24 24 p= 0.03 | | | | | |
|  | PTPmin | 1.05 | 0.96 | 0.88 | 0.01 |
| t0 - t12 p= 0.15; t0 - t24 p= 0.004; t12 - t24 p= 0.18 | | | | | |
| NAVA |  |  |  |  |  |
|  | VT | 0.45 | 0.35 | 0.42 | p<0.0001 |
| t0 - t12 p< 0.001; t0 - t24 24 p<0.001 t12 - t24 p= <0.001 | | | | | |
|  | RR | 0.46 | 0.36 | 0.51 | p<0.0001 |
| t0 - t12 12 p<0.0001; t0 - t24 p= 0.01; t12 - t24 p<0.0001 | | | | | |
|  | PS | 0.65 | 0.60 | 0.65 | 0.21 |
| t0 - t12 p= 0.10; t0 - t24 24 p= 0.94; t12 - t24 24 p= 0.13 | | | | | |
|  | PTPmin | 0.86 | 0.94 | 1.15 | p<0.001 |
| t0 - t12 p= 0.15; t0- t24 p<0.0001; t12 - t24 p= 0.01 | | | | | |

Table 2s: coefficient of variation reported as ratio between standard deviation and means measured at different times. PSV pressure support ventilation, NAVA Neurally adjusted ventilatory assist, VT tidal volume (l), RR: respiratory rate (breaths/min), PTP: pressure-time product (cmH2O.s/min), t0 at the beginning of treatment, t12 after 12 hours of treatment, t24 after 24 hours of treatment.

|  | NAVA group (n=10) | Variable PSV group (n=10) | p |
| --- | --- | --- | --- |
| PTPcw t0 (cmH2O.s) | 1.17 (0.35 - 3.02) | 1.09 (-3.66 - 3.09) | 0.93 |
| PTPcw t12 (cmH2O.s) | 1.01 (0.58 - 2.77) | 1.03 (-1.4 - 3.01) | 0.93 |
| PTPcw t24 (cmH2O.s) | 1.13 (-0.04 - 14.04) | 1.06 (-5.47 - 2.26) | 0.79 |
| PTPpeep t0 (cmH2O.s) | 0.33 (0.24 - 1.51) | 0.45 (0.06 - 1.45) | 0.79 |
| PTPpeep t12 (cmH2O.s) | 0.4 (0.21 - 1.69) | 0.59 (0.19 - 2.42) | 1 |
| PTPpeep t24 (cmH2O.s) | 0.47 (0.02 - 18.37) | 0.315 (-0.12 - 1.22) | 0.36 |
| PTPlung t0 (cmH2O.s) | 0.62 (0.11 - 7.43) | 1.84 (0.52 - 5.08) | 0.79 |
| PTPlung t12 (cmH2O.s) | 1.04 (0.22 - 10.15) | 2.96 (0.22 - 7.65) | 1 |
| PTPlung t24 (cmH2O.s) | 0.18 (0.01 - 8.89) | 2.16 (0.25 - 4.71) | 0.17 |

Table 3s: PTPlung, PTPcw and PTPPEEPi over time between NAVA and variable PSV groups. Continuous data are reported as median (interquartile range). PTP: pressure-time product, s second, PSV pressure support ventilation, NAVA Neurally adjusted ventilatory assist, t0 at the beginning of treatment, t12 after 12 hours of treatment, t24 after 24 hours of treatment.

|  | NAVA (n=10) | Variable PSV (n=10) | p |
| --- | --- | --- | --- |
| pHa t0 (mmol/L) | 7.40 ± 0.08 | 7.42 ± 0,09 | 0.79 |
| pHa t12 (mmol/L) | 7.39 ± 0.10 | 7.45 ± 0,09 | 0.24 |
| pHa t24 (mmol/L) | 7.40 ± 0.14 | 7.45 ± 0,07 | 0.66 |
| PaO2 t0 (mm Hg) | 92.74 ± 16.85 | 112.92 ± 29,63 | 0.24 |
| PaO2 t12 (mm Hg) | 120.2 ± 25.15 | 151.78 ±70,83 | 1 |
| PaO2 t24 (mm Hg) | 119.90 ± 41.77 | 112.95 ± 21,47 | 1 |
| PaCO2 t0 (mm Hg) | 39.08 ± 9.9 | 46.15 ± 5,85 | 0.32 |
| PaCO2 t12 (mm Hg) | 39.40 ± 8.87 | 43.23 ± 9,65 | 0.43 |
| PaO2 24 t24 (mm Hg) | 41.70 ± 8.27 | 44.45 ± 5,76 | 0.66 |
| SaO2 t0 (%) | 95.84 ± 1.67 | 96.88 ± 1,49 | 0.24 |
| SaO2 t12 (%) | 97.16 ± 1.03 | 97.17 ± 1,57 | 0.66 |
| SaO2 t24 (%) | 96.34 ± 2.38 | 97.13 ± 1,11 | 0.79 |
| HCO3 t0 (mEq/L) | 24.02 ± 5.04 | 28.80 ± 6,78 | 0.33 |
| HCO3 t12 (mEq/L) | 24.90 ± 7.09 | 28.96 ± 4,65 | 0.25 |
| HCO3 t24 (mEq/L) | 25.90 ± 6.58 | 30.02 ± 5,63 | 0.43 |
| Lac t0 (mEq/L) | 1.17 ± 0.57 | 1.87 ± 1,13 | 0.17 |
| Lac t12 (mEq/L) | 1.45 ± 0.24 | 2.02 ± 1,13 | 0.33 |
| Lac t24 (mEq/L) | 1.41 ± 0.66 | 2.57 ± 1,41 | 0.43 |

Table 4s: Arterial blood gas over time of included patients. Continuous data are reported as mean and standard deviation. PSV pressure support ventilation, NAVA Neurally adjusted ventilatory assist, t0 at the beginning of treatment, t12 after 12 hours of treatment, t24 after 24 hours of treatment.

Figure 1s: Density plot of pressure-time product per minute (PTPmin) distribution during Variable PSV (upper box) and NAVA (lower box). Distribution of work of breathing tends to narrow in both ventilation modes as time goes by. PSV pressure support ventilation, NAVA Neurally adjusted ventilatory assist.


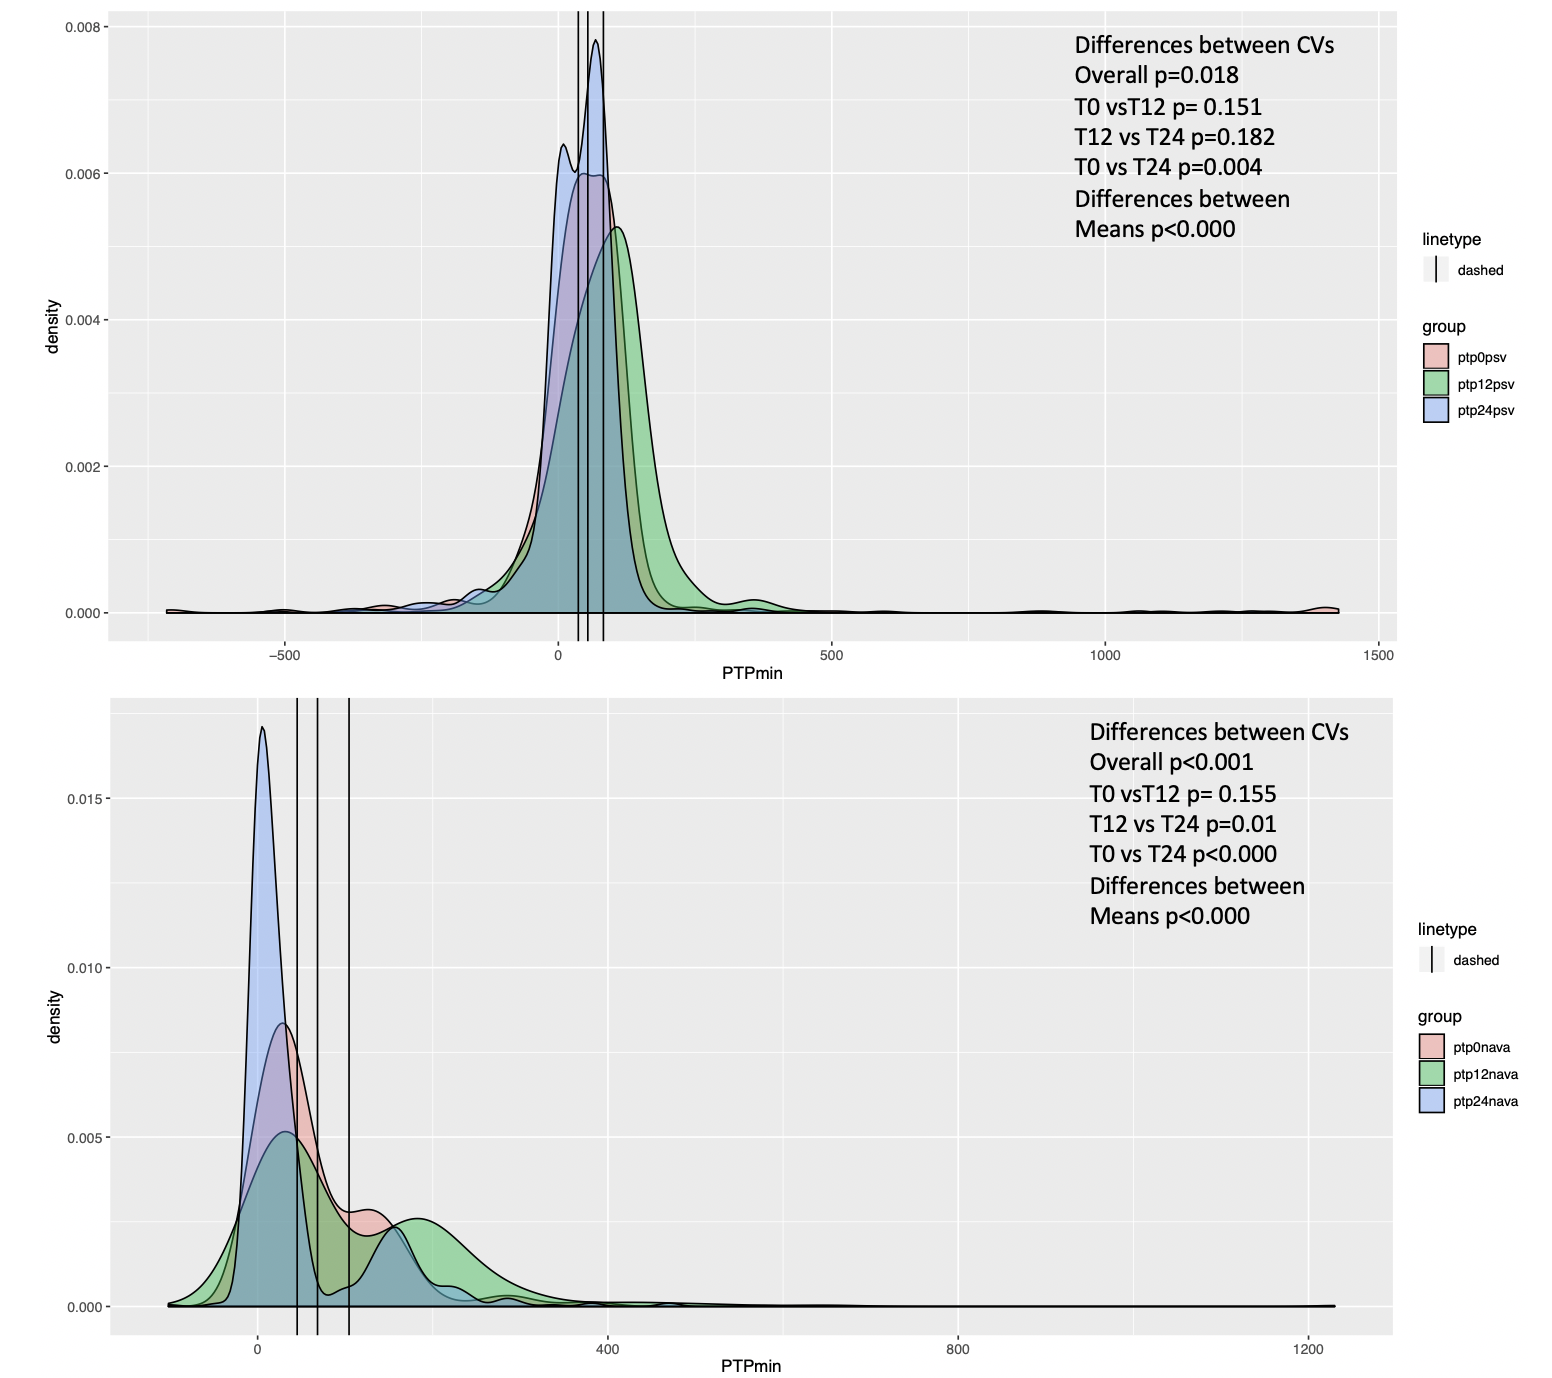


Figure 2s:

Density plot of coefficient of variation (CV) pressure-time product per minute (PTPmin) distribution for variable PSV (upper box) and NAVA (lower box). NAVA ventilation reduced more effectively than variable PSV the variability of CV over the time; this finding suggests that NAVA might successfully adapt the work of breathing to the conditions of patient respiratory system. PSV pressure support ventilation, NAVA Neurally adjusted ventilatory assist.
